# Supplementary material
Source: publisher figshare collection journal article supplement (https://acs.figshare.com/ndownloader/files/3719953)
Supplement: Supplementary file 1 [file 3719953]

 
data_tb094 
  
_audit_creation_method            SHELXL-97 
_chemical_name_systematic 
; 
 ? 
; 
_chemical_name_common             ? 
_chemical_melting_point           ? 
_chemical_formula_moiety          ? 
_chemical_formula_sum 
 'C20 H24 F3 Fe N2 O6 P S3' 
_chemical_formula_weight          628.41 
  
loop_ 
 _atom_type_symbol 
 _atom_type_description 
 _atom_type_scat_dispersion_real 
 _atom_type_scat_dispersion_imag 
 _atom_type_scat_source 
 'C'  'C'   0.0033   0.0016 
 'International Tables Vol C Tables 4.2.6.8 and 6.1.1.4' 
 'H'  'H'   0.0000   0.0000 
 'International Tables Vol C Tables 4.2.6.8 and 6.1.1.4' 
 'N'  'N'   0.0061   0.0033 
 'International Tables Vol C Tables 4.2.6.8 and 6.1.1.4' 
 'O'  'O'   0.0106   0.0060 
 'International Tables Vol C Tables 4.2.6.8 and 6.1.1.4' 
 'F'  'F'   0.0171   0.0103 
 'International Tables Vol C Tables 4.2.6.8 and 6.1.1.4' 
 'P'  'P'   0.1023   0.0942 
 'International Tables Vol C Tables 4.2.6.8 and 6.1.1.4' 
 'S'  'S'   0.1246   0.1234 
 'International Tables Vol C Tables 4.2.6.8 and 6.1.1.4' 
 'Fe'  'Fe'   0.3463   0.8444 
 'International Tables Vol C Tables 4.2.6.8 and 6.1.1.4' 
  
_symmetry_cell_setting            Triclinic 
_symmetry_space_group_name_H-M    P-1 
  
loop_ 
 _symmetry_equiv_pos_as_xyz 
 'x, y, z' 
 '-x, -y, -z' 
  
_cell_length_a                    10.6895(5) 
_cell_length_b                    11.2318(5) 
_cell_length_c                    11.5933(5) 
_cell_angle_alpha                 74.390(3) 
_cell_angle_beta                  85.483(3) 
_cell_angle_gamma                 75.255(3) 
_cell_volume                      1296.35(10) 
_cell_formula_units_Z             2 
_cell_measurement_temperature     200(2) 
_cell_measurement_reflns_used     2280 
_cell_measurement_theta_min       2.41 
_cell_measurement_theta_max       27.99 
  
_exptl_crystal_description        block 
_exptl_crystal_colour             green 
_exptl_crystal_size_max           0.13 
_exptl_crystal_size_mid           0.05 
_exptl_crystal_size_min           0.04 
_exptl_crystal_density_meas       n/a 
_exptl_crystal_density_diffrn     1.610 
_exptl_crystal_density_method     'not measured' 
_exptl_crystal_F_000              644 
_exptl_absorpt_coefficient_mu     0.946 
_exptl_absorpt_correction_type    multi-scan 
_exptl_absorpt_correction_T_min   0.8869 
_exptl_absorpt_correction_T_max   0.9632 
_exptl_absorpt_process_details    'SADABS, Bruker (2003)' 
  
_exptl_special_details 
; 
 Data collection is performed with four batch runs at phi = 0.00 deg 
 (600 frames), at phi = 90.00 deg (600 frames), at phi = 180.00 deg 
 (600 frames), and at phi = 270.00 deg (600 frames). 
 A fifth batch run is collected at phi = 0.00 deg (50 frames) to monitor 
 crystal and diffractometer stability. Frame width = 0.30 deg in omega. 
 Data is merged, corrected for decay (if any), and treated with multi-scan 
 absorption corrections (if required). All symmetry-equivalent reflections 
 are merged for centrosymmetric data. 
 Friedel pairs are not merged for noncentrosymmetric data. 
; 
  
_diffrn_ambient_temperature       200(2) 
_diffrn_radiation_wavelength      0.71073 
_diffrn_radiation_type            MoK\a 
_diffrn_radiation_source          'fine-focus sealed tube' 
_diffrn_radiation_monochromator   graphite 
_diffrn_measurement_device_type   'Bruker APEX-II CCD' 
_diffrn_measurement_method        '\f and \w scans' 
_diffrn_detector_area_resol_mean  ? 
_diffrn_reflns_number             16057 
_diffrn_reflns_av_R_equivalents   0.0755 
_diffrn_reflns_av_sigmaI/netI     0.1341 
_diffrn_reflns_limit_h_min        -14 
_diffrn_reflns_limit_h_max        14 
_diffrn_reflns_limit_k_min        -15 
_diffrn_reflns_limit_k_max        14 
_diffrn_reflns_limit_l_min        -15 
_diffrn_reflns_limit_l_max        15 
_diffrn_reflns_theta_min          1.82 
_diffrn_reflns_theta_max          28.42 
_reflns_number_total              6380 
_reflns_number_gt                 3267 
_reflns_threshold_expression      >2sigma(I) 
  
_computing_data_collection        'APEX II, Bruker (2009)' 
_computing_cell_refinement        'APEX II, Bruker (2009)' 
_computing_data_reduction         'XPREP, Bruker (2009)' 
_computing_structure_solution     'SHELXS-97 (Sheldrick, 2008)' 
_computing_structure_refinement   'SHELXL-97 (Sheldrick, 2008)' 
_computing_molecular_graphics     'SHELXTL, Bruker (2004)' 
_computing_publication_material   'SHELXTL, Bruker (2004)' 
  
_refine_special_details 
; 
 Refinement of F^2^ against ALL reflections.  The weighted R-factor wR and 
 goodness of fit S are based on F^2^, conventional R-factors R are based 
 on F, with F set to zero for negative F^2^. The threshold expression of 
 F^2^ > 2sigma(F^2^) is used only for calculating R-factors(gt) etc. and is 
 not relevant to the choice of reflections for refinement.  R-factors based 
 on F^2^ are statistically about twice as large as those based on F, and R- 
 factors based on ALL data will be even larger. 
; 
  
_refine_ls_structure_factor_coef  Fsqd 
_refine_ls_matrix_type            full 
_refine_ls_weighting_scheme       calc 
_refine_ls_weighting_details 
 'calc w=1/[\s^2^(Fo^2^)+(0.0408P)^2^]' 
_atom_sites_solution_primary      direct 
_atom_sites_solution_secondary    difmap 
_atom_sites_solution_hydrogens    geom 
_refine_ls_hydrogen_treatment     constr 
_refine_ls_extinction_method      none 
_refine_ls_extinction_coef        ? 
_refine_ls_number_reflns          6380 
_refine_ls_number_parameters      335 
_refine_ls_number_restraints      282 
_refine_ls_R_factor_all           0.1591 
_refine_ls_R_factor_gt            0.0655 
_refine_ls_wR_factor_ref          0.1167 
_refine_ls_wR_factor_gt           0.0959 
_refine_ls_goodness_of_fit_ref    1.019 
_refine_ls_restrained_S_all       1.003 
_refine_ls_shift/su_max           0.001 
_refine_ls_shift/su_mean          0.000 
  
loop_ 
 _atom_site_label 
 _atom_site_type_symbol 
 _atom_site_fract_x 
 _atom_site_fract_y 
 _atom_site_fract_z 
 _atom_site_U_iso_or_equiv 
 _atom_site_adp_type 
 _atom_site_occupancy 
 _atom_site_symmetry_multiplicity 
 _atom_site_calc_flag 
 _atom_site_refinement_flags 
 _atom_site_disorder_assembly 
 _atom_site_disorder_group 
Fe1 Fe 0.43917(5) 0.62556(5) 0.06535(4) 0.02706(15) Uani 1 1 d U . . 
S1 S 0.36541(8) 0.52958(9) -0.05602(8) 0.0287(2) Uani 1 1 d U . . 
S2 S 0.52394(14) 0.69908(11) 0.19652(10) 0.0623(4) Uani 1 1 d U . . 
S3 S 0.77476(11) 0.83547(10) 0.43411(9) 0.0466(3) Uani 1 1 d U . . 
P1 P 0.25438(9) 0.76347(9) 0.07060(9) 0.0306(2) Uani 1 1 d U . . 
F1 F 0.8279(3) 0.9394(3) 0.5954(3) 0.0857(9) Uani 1 1 d U . . 
F2 F 0.8991(4) 1.0092(4) 0.4206(3) 0.1264(14) Uani 1 1 d U . . 
F3 F 0.6987(4) 1.0657(3) 0.4574(4) 0.1409(15) Uani 1 1 d U . . 
O1 O 0.1764(2) 0.7346(2) 0.1915(2) 0.0402(7) Uani 1 1 d U A . 
O2 O 0.1424(2) 0.7906(2) -0.0229(2) 0.0356(6) Uani 1 1 d U A . 
O3 O 0.2798(2) 0.9011(2) 0.0563(2) 0.0429(7) Uani 1 1 d U A . 
O4 O 0.6594(3) 0.8131(3) 0.4986(2) 0.0529(8) Uani 1 1 d U . . 
O5 O 0.8898(3) 0.7356(3) 0.4703(2) 0.0659(9) Uani 1 1 d U . . 
O6 O 0.7602(3) 0.8849(3) 0.3063(2) 0.0578(8) Uani 1 1 d U . . 
N1 N 0.3875(3) 0.4963(3) 0.1983(2) 0.0269(7) Uani 1 1 d U . . 
N2 N 0.4893(3) 0.7457(3) -0.0714(3) 0.0308(7) Uani 1 1 d U . . 
C1 C 0.2626(3) 0.4590(3) 0.0524(3) 0.0279(8) Uani 1 1 d U . . 
C2 C 0.1655(3) 0.4106(3) 0.0218(3) 0.0331(9) Uani 1 1 d U A . 
H2A H 0.1550 0.4121 -0.0593 0.040 Uiso 1 1 calc R . . 
C3 C 0.0850(3) 0.3607(4) 0.1097(4) 0.0418(10) Uani 1 1 d U . . 
H3A H 0.0195 0.3269 0.0889 0.050 Uiso 1 1 calc R A . 
C4 C 0.0979(3) 0.3590(3) 0.2274(4) 0.0408(10) Uani 1 1 d U A . 
H4A H 0.0406 0.3255 0.2868 0.049 Uiso 1 1 calc R . . 
C5 C 0.1939(3) 0.4058(3) 0.2595(3) 0.0364(9) Uani 1 1 d U . . 
H5A H 0.2023 0.4056 0.3405 0.044 Uiso 1 1 calc R A . 
C6 C 0.2785(3) 0.4534(3) 0.1719(3) 0.0264(8) Uani 1 1 d U A . 
C7 C 0.4417(3) 0.4401(3) 0.3006(3) 0.0314(9) Uani 1 1 d U A . 
H7A H 0.4018 0.3792 0.3529 0.038 Uiso 1 1 calc R . . 
C8 C 0.6108(4) 0.5622(4) 0.3016(3) 0.0383(9) Uani 1 1 d U A . 
C9 C 0.5565(4) 0.4587(4) 0.3457(3) 0.0357(9) Uani 1 1 d U . . 
C10 C 0.6194(5) 0.3598(4) 0.4378(4) 0.0640(14) Uani 1 1 d U A . 
H10A H 0.5817 0.2901 0.4722 0.077 Uiso 1 1 calc R . . 
C11 C 0.7366(6) 0.3610(5) 0.4808(5) 0.092(2) Uani 1 1 d U . . 
H11A H 0.7798 0.2911 0.5422 0.110 Uiso 1 1 calc R A . 
C12 C 0.7891(5) 0.4612(5) 0.4354(5) 0.0766(17) Uani 1 1 d U A . 
H12A H 0.8693 0.4615 0.4651 0.092 Uiso 1 1 calc R . . 
C13 C 0.7273(4) 0.5640(5) 0.3458(4) 0.0575(12) Uani 1 1 d U . . 
H13A H 0.7642 0.6349 0.3149 0.069 Uiso 1 1 calc R A . 
C14 C 0.6113(6) 0.8102(6) 0.1302(6) 0.0295(17) Uani 0.50 1 d PU A 1 
H14A H 0.6449 0.8378 0.1923 0.044 Uiso 0.50 1 calc PR A 1 
H14B H 0.5550 0.8839 0.0768 0.044 Uiso 0.50 1 calc PR A 1 
H14C H 0.6836 0.7720 0.0839 0.044 Uiso 0.50 1 calc PR A 1 
C14' C 0.4518(9) 0.7734(9) 0.2845(8) 0.069(3) Uani 0.50 1 d PU A 2 
H14D H 0.5144 0.7928 0.3297 0.103 Uiso 0.50 1 calc PR A 2 
H14E H 0.4001 0.7220 0.3401 0.103 Uiso 0.50 1 calc PR A 2 
H14F H 0.3948 0.8530 0.2402 0.103 Uiso 0.50 1 calc PR A 2 
C15 C 0.0395(4) 0.7460(5) 0.2084(4) 0.0782(17) Uani 1 1 d U . . 
H15A H 0.0196 0.7216 0.2943 0.117 Uiso 1 1 calc R A . 
H15B H 0.0130 0.6897 0.1688 0.117 Uiso 1 1 calc R . . 
H15C H -0.0072 0.8343 0.1739 0.117 Uiso 1 1 calc R . . 
C16 C 0.1658(4) 0.8377(4) -0.1502(3) 0.0436(11) Uani 1 1 d U . . 
H16A H 0.0874 0.8490 -0.1945 0.065 Uiso 1 1 calc R A . 
H16B H 0.2369 0.7763 -0.1769 0.065 Uiso 1 1 calc R . . 
H16C H 0.1887 0.9197 -0.1652 0.065 Uiso 1 1 calc R . . 
C17 C 0.1777(4) 1.0095(4) 0.0692(5) 0.0840(18) Uani 1 1 d U . . 
H17A H 0.2137 1.0840 0.0576 0.126 Uiso 1 1 calc R A . 
H17B H 0.1393 0.9906 0.1496 0.126 Uiso 1 1 calc R . . 
H17C H 0.1111 1.0274 0.0093 0.126 Uiso 1 1 calc R . . 
C18 C 0.5162(3) 0.8153(3) -0.1535(3) 0.0334(9) Uani 1 1 d U A . 
C19 C 0.5500(4) 0.9064(4) -0.2594(4) 0.0519(12) Uani 1 1 d U . . 
H19A H 0.5684 0.8669 -0.3266 0.078 Uiso 1 1 calc R A . 
H19B H 0.6267 0.9315 -0.2429 0.078 Uiso 1 1 calc R . . 
H19C H 0.4776 0.9818 -0.2797 0.078 Uiso 1 1 calc R . . 
C20 C 0.8021(6) 0.9676(6) 0.4786(5) 0.0751(15) Uani 1 1 d U . . 
  
loop_ 
 _atom_site_aniso_label 
 _atom_site_aniso_U_11 
 _atom_site_aniso_U_22 
 _atom_site_aniso_U_33 
 _atom_site_aniso_U_23 
 _atom_site_aniso_U_13 
 _atom_site_aniso_U_12 
Fe1 0.0238(3) 0.0338(3) 0.0247(3) -0.0072(2) 0.0018(2) -0.0100(2) 
S1 0.0241(5) 0.0376(6) 0.0260(5) -0.0089(4) 0.0009(4) -0.0099(4) 
S2 0.1069(11) 0.0566(8) 0.0360(7) 0.0037(6) -0.0244(7) -0.0516(8) 
S3 0.0513(7) 0.0435(7) 0.0382(6) -0.0062(5) 0.0113(5) -0.0075(6) 
P1 0.0292(6) 0.0321(6) 0.0291(6) -0.0056(4) -0.0001(4) -0.0073(5) 
F1 0.116(2) 0.102(2) 0.0574(19) -0.0268(17) 0.0112(17) -0.0566(19) 
F2 0.175(3) 0.178(4) 0.060(2) 0.005(2) 0.000(2) -0.140(3) 
F3 0.165(3) 0.051(2) 0.209(4) -0.051(2) -0.060(3) 0.004(2) 
O1 0.0329(15) 0.0510(17) 0.0303(15) -0.0086(12) 0.0068(12) -0.0026(13) 
O2 0.0278(15) 0.0467(17) 0.0298(14) -0.0011(12) -0.0020(11) -0.0132(12) 
O3 0.0360(16) 0.0275(15) 0.0620(19) -0.0056(13) -0.0117(13) -0.0052(13) 
O4 0.0524(18) 0.0540(19) 0.0515(18) -0.0150(15) 0.0209(14) -0.0168(15) 
O5 0.055(2) 0.065(2) 0.0500(19) -0.0018(16) 0.0117(15) 0.0165(17) 
O6 0.065(2) 0.058(2) 0.0399(17) -0.0002(15) 0.0040(15) -0.0101(16) 
N1 0.0241(17) 0.0296(17) 0.0265(16) -0.0100(13) 0.0027(13) -0.0037(13) 
N2 0.0270(18) 0.0357(19) 0.0311(18) -0.0098(15) 0.0012(14) -0.0093(15) 
C1 0.021(2) 0.027(2) 0.033(2) -0.0059(16) 0.0002(15) -0.0014(16) 
C2 0.021(2) 0.037(2) 0.040(2) -0.0072(18) -0.0034(16) -0.0051(17) 
C3 0.022(2) 0.040(2) 0.060(3) -0.007(2) -0.0019(19) -0.0088(18) 
C4 0.025(2) 0.037(2) 0.051(3) 0.006(2) 0.0042(19) -0.0099(19) 
C5 0.033(2) 0.036(2) 0.033(2) -0.0041(18) 0.0049(17) -0.0028(19) 
C6 0.022(2) 0.024(2) 0.030(2) -0.0054(15) 0.0001(15) -0.0004(16) 
C7 0.035(2) 0.033(2) 0.024(2) -0.0088(17) 0.0021(16) -0.0046(18) 
C8 0.034(2) 0.053(2) 0.035(2) -0.0242(19) -0.0043(18) -0.0077(19) 
C9 0.039(2) 0.036(2) 0.032(2) -0.0164(18) -0.0077(18) 0.0002(19) 
C10 0.082(3) 0.036(3) 0.073(3) -0.016(2) -0.047(3) 0.004(2) 
C11 0.106(5) 0.048(3) 0.119(5) -0.032(3) -0.084(4) 0.020(3) 
C12 0.050(3) 0.074(4) 0.118(5) -0.063(3) -0.045(3) 0.018(3) 
C13 0.041(3) 0.080(3) 0.064(3) -0.041(3) -0.006(2) -0.012(2) 
C14 0.027(4) 0.027(4) 0.038(4) -0.016(3) -0.001(3) -0.005(3) 
C14' 0.088(7) 0.057(6) 0.069(7) -0.037(5) -0.039(5) 0.002(5) 
C15 0.036(3) 0.110(4) 0.054(3) 0.005(3) 0.017(2) 0.009(3) 
C16 0.043(3) 0.052(3) 0.030(2) 0.0053(19) -0.0028(18) -0.017(2) 
C17 0.060(3) 0.029(3) 0.153(5) -0.018(3) -0.029(3) 0.011(2) 
C18 0.031(2) 0.034(2) 0.034(2) -0.0093(18) 0.0044(18) -0.0060(18) 
C19 0.052(3) 0.048(3) 0.049(3) -0.002(2) 0.013(2) -0.017(2) 
C20 0.086(4) 0.077(4) 0.068(4) -0.011(3) -0.004(3) -0.037(3) 
  
_geom_special_details 
; 
 All esds (except the esd in the dihedral angle between two l.s. planes) 
 are estimated using the full covariance matrix.  The cell esds are taken 
 into account individually in the estimation of esds in distances, angles 
 and torsion angles; correlations between esds in cell parameters are only 
 used when they are defined by crystal symmetry.  An approximate (isotropic) 
 treatment of cell esds is used for estimating esds involving l.s. planes. 
; 
  
loop_ 
 _geom_bond_atom_site_label_1 
 _geom_bond_atom_site_label_2 
 _geom_bond_distance 
 _geom_bond_site_symmetry_2 
 _geom_bond_publ_flag 
Fe1 N2 1.925(3) . ? 
Fe1 N1 1.964(3) . ? 
Fe1 P1 2.1862(11) . ? 
Fe1 S2 2.2560(12) . ? 
Fe1 S1 2.2776(10) . ? 
Fe1 S1 2.3716(11) 2_665 ? 
S1 C1 1.762(3) . ? 
S1 Fe1 2.3716(11) 2_665 ? 
S2 C14' 1.530(9) . ? 
S2 C14 1.728(6) . ? 
S2 C8 1.776(4) . ? 
S3 O4 1.433(3) . ? 
S3 O5 1.440(3) . ? 
S3 O6 1.441(3) . ? 
S3 C20 1.792(5) . ? 
P1 O1 1.572(2) . ? 
P1 O2 1.594(2) . ? 
P1 O3 1.599(2) . ? 
F1 C20 1.339(5) . ? 
F2 C20 1.309(5) . ? 
F3 C20 1.331(6) . ? 
O1 C15 1.439(4) . ? 
O2 C16 1.452(4) . ? 
O3 C17 1.446(5) . ? 
N1 C7 1.289(4) . ? 
N1 C6 1.451(4) . ? 
N2 C18 1.128(4) . ? 
C1 C6 1.391(4) . ? 
C1 C2 1.396(4) . ? 
C2 C3 1.376(5) . ? 
C3 C4 1.377(5) . ? 
C4 C5 1.381(5) . ? 
C5 C6 1.394(5) . ? 
C7 C9 1.453(5) . ? 
C8 C9 1.387(5) . ? 
C8 C13 1.391(5) . ? 
C9 C10 1.387(5) . ? 
C10 C11 1.389(6) . ? 
C11 C12 1.347(7) . ? 
C12 C13 1.386(6) . ? 
C18 C19 1.457(5) . ? 
  
loop_ 
 _geom_angle_atom_site_label_1 
 _geom_angle_atom_site_label_2 
 _geom_angle_atom_site_label_3 
 _geom_angle 
 _geom_angle_site_symmetry_1 
 _geom_angle_site_symmetry_3 
 _geom_angle_publ_flag 
N2 Fe1 N1 176.44(12) . . ? 
N2 Fe1 P1 88.92(9) . . ? 
N1 Fe1 P1 92.34(9) . . ? 
N2 Fe1 S2 93.12(9) . . ? 
N1 Fe1 S2 90.19(9) . . ? 
P1 Fe1 S2 90.71(5) . . ? 
N2 Fe1 S1 91.00(9) . . ? 
N1 Fe1 S1 85.60(8) . . ? 
P1 Fe1 S1 94.10(4) . . ? 
S2 Fe1 S1 173.73(5) . . ? 
N2 Fe1 S1 91.79(9) . 2_665 ? 
N1 Fe1 S1 86.81(8) . 2_665 ? 
P1 Fe1 S1 177.35(4) . 2_665 ? 
S2 Fe1 S1 91.80(5) . 2_665 ? 
S1 Fe1 S1 83.34(4) . 2_665 ? 
C1 S1 Fe1 95.61(12) . . ? 
C1 S1 Fe1 108.61(11) . 2_665 ? 
Fe1 S1 Fe1 96.66(4) . 2_665 ? 
C14' S2 C14 94.7(4) . . ? 
C14' S2 C8 98.6(4) . . ? 
C14 S2 C8 115.0(3) . . ? 
C14' S2 Fe1 128.0(3) . . ? 
C14 S2 Fe1 114.1(2) . . ? 
C8 S2 Fe1 106.00(13) . . ? 
O4 S3 O5 114.95(17) . . ? 
O4 S3 O6 114.99(18) . . ? 
O5 S3 O6 114.36(18) . . ? 
O4 S3 C20 103.6(2) . . ? 
O5 S3 C20 104.3(3) . . ? 
O6 S3 C20 102.5(2) . . ? 
O1 P1 O2 100.07(13) . . ? 
O1 P1 O3 105.46(14) . . ? 
O2 P1 O3 103.51(13) . . ? 
O1 P1 Fe1 114.42(10) . . ? 
O2 P1 Fe1 122.27(11) . . ? 
O3 P1 Fe1 109.40(10) . . ? 
C15 O1 P1 128.4(2) . . ? 
C16 O2 P1 120.2(2) . . ? 
C17 O3 P1 122.5(3) . . ? 
C7 N1 C6 116.8(3) . . ? 
C7 N1 Fe1 129.0(2) . . ? 
C6 N1 Fe1 114.1(2) . . ? 
C18 N2 Fe1 178.0(3) . . ? 
C6 C1 C2 119.4(3) . . ? 
C6 C1 S1 118.5(3) . . ? 
C2 C1 S1 122.1(3) . . ? 
C3 C2 C1 119.6(4) . . ? 
C4 C3 C2 121.0(4) . . ? 
C3 C4 C5 120.3(3) . . ? 
C4 C5 C6 119.4(4) . . ? 
C1 C6 C5 120.3(3) . . ? 
C1 C6 N1 116.4(3) . . ? 
C5 C6 N1 123.3(3) . . ? 
N1 C7 C9 127.8(3) . . ? 
C9 C8 C13 120.8(4) . . ? 
C9 C8 S2 119.4(3) . . ? 
C13 C8 S2 119.5(3) . . ? 
C10 C9 C8 118.0(4) . . ? 
C10 C9 C7 115.7(4) . . ? 
C8 C9 C7 126.2(3) . . ? 
C11 C10 C9 121.1(5) . . ? 
C12 C11 C10 120.0(5) . . ? 
C11 C12 C13 120.8(5) . . ? 
C12 C13 C8 119.3(5) . . ? 
N2 C18 C19 179.4(5) . . ? 
F2 C20 F1 106.6(4) . . ? 
F2 C20 F3 106.6(5) . . ? 
F1 C20 F3 107.0(5) . . ? 
F2 C20 S3 112.5(4) . . ? 
F1 C20 S3 112.8(4) . . ? 
F3 C20 S3 111.0(4) . . ? 
  
loop_ 
 _geom_torsion_atom_site_label_1 
 _geom_torsion_atom_site_label_2 
 _geom_torsion_atom_site_label_3 
 _geom_torsion_atom_site_label_4 
 _geom_torsion 
 _geom_torsion_site_symmetry_1 
 _geom_torsion_site_symmetry_2 
 _geom_torsion_site_symmetry_3 
 _geom_torsion_site_symmetry_4 
 _geom_torsion_publ_flag 
N2 Fe1 S1 C1 -158.79(14) . . . . ? 
N1 Fe1 S1 C1 22.24(13) . . . . ? 
P1 Fe1 S1 C1 -69.79(11) . . . . ? 
S2 Fe1 S1 C1 70.2(5) . . . . ? 
S1 Fe1 S1 C1 109.53(12) 2_665 . . . ? 
N2 Fe1 S1 Fe1 91.68(9) . . . 2_665 ? 
N1 Fe1 S1 Fe1 -87.29(9) . . . 2_665 ? 
P1 Fe1 S1 Fe1 -179.33(4) . . . 2_665 ? 
S2 Fe1 S1 Fe1 -39.3(4) . . . 2_665 ? 
S1 Fe1 S1 Fe1 0.0 2_665 . . 2_665 ? 
N2 Fe1 S2 C14' 110.3(5) . . . . ? 
N1 Fe1 S2 C14' -71.0(5) . . . . ? 
P1 Fe1 S2 C14' 21.3(5) . . . . ? 
S1 Fe1 S2 C14' -118.8(6) . . . . ? 
S1 Fe1 S2 C14' -157.8(5) 2_665 . . . ? 
N2 Fe1 S2 C14 -7.3(3) . . . . ? 
N1 Fe1 S2 C14 171.4(3) . . . . ? 
P1 Fe1 S2 C14 -96.2(3) . . . . ? 
S1 Fe1 S2 C14 123.7(5) . . . . ? 
S1 Fe1 S2 C14 84.6(3) 2_665 . . . ? 
N2 Fe1 S2 C8 -134.88(16) . . . . ? 
N1 Fe1 S2 C8 43.82(16) . . . . ? 
P1 Fe1 S2 C8 136.16(14) . . . . ? 
S1 Fe1 S2 C8 -3.9(5) . . . . ? 
S1 Fe1 S2 C8 -42.99(14) 2_665 . . . ? 
N2 Fe1 P1 O1 -164.03(14) . . . . ? 
N1 Fe1 P1 O1 19.29(14) . . . . ? 
S2 Fe1 P1 O1 -70.93(12) . . . . ? 
S1 Fe1 P1 O1 105.05(11) . . . . ? 
S1 Fe1 P1 O1 90.4(9) 2_665 . . . ? 
N2 Fe1 P1 O2 75.05(14) . . . . ? 
N1 Fe1 P1 O2 -101.63(13) . . . . ? 
S2 Fe1 P1 O2 168.15(11) . . . . ? 
S1 Fe1 P1 O2 -15.88(11) . . . . ? 
S1 Fe1 P1 O2 -30.5(10) 2_665 . . . ? 
N2 Fe1 P1 O3 -45.98(14) . . . . ? 
N1 Fe1 P1 O3 137.35(14) . . . . ? 
S2 Fe1 P1 O3 47.13(11) . . . . ? 
S1 Fe1 P1 O3 -136.90(11) . . . . ? 
S1 Fe1 P1 O3 -151.5(9) 2_665 . . . ? 
O2 P1 O1 C15 -6.6(4) . . . . ? 
O3 P1 O1 C15 100.6(4) . . . . ? 
Fe1 P1 O1 C15 -139.1(3) . . . . ? 
O1 P1 O2 C16 172.4(3) . . . . ? 
O3 P1 O2 C16 63.7(3) . . . . ? 
Fe1 P1 O2 C16 -60.1(3) . . . . ? 
O1 P1 O3 C17 -49.6(3) . . . . ? 
O2 P1 O3 C17 55.0(3) . . . . ? 
Fe1 P1 O3 C17 -173.1(3) . . . . ? 
N2 Fe1 N1 C7 128.2(19) . . . . ? 
P1 Fe1 N1 C7 -121.1(3) . . . . ? 
S2 Fe1 N1 C7 -30.4(3) . . . . ? 
S1 Fe1 N1 C7 145.0(3) . . . . ? 
S1 Fe1 N1 C7 61.4(3) 2_665 . . . ? 
N2 Fe1 N1 C6 -47(2) . . . . ? 
P1 Fe1 N1 C6 63.8(2) . . . . ? 
S2 Fe1 N1 C6 154.5(2) . . . . ? 
S1 Fe1 N1 C6 -30.1(2) . . . . ? 
S1 Fe1 N1 C6 -113.7(2) 2_665 . . . ? 
N1 Fe1 N2 C18 37(10) . . . . ? 
P1 Fe1 N2 C18 -74(9) . . . . ? 
S2 Fe1 N2 C18 -165(9) . . . . ? 
S1 Fe1 N2 C18 20(9) . . . . ? 
S1 Fe1 N2 C18 103(9) 2_665 . . . ? 
Fe1 S1 C1 C6 -15.0(3) . . . . ? 
Fe1 S1 C1 C6 84.0(3) 2_665 . . . ? 
Fe1 S1 C1 C2 164.1(3) . . . . ? 
Fe1 S1 C1 C2 -96.9(3) 2_665 . . . ? 
C6 C1 C2 C3 1.4(5) . . . . ? 
S1 C1 C2 C3 -177.6(3) . . . . ? 
C1 C2 C3 C4 0.7(5) . . . . ? 
C2 C3 C4 C5 -1.1(6) . . . . ? 
C3 C4 C5 C6 -0.8(5) . . . . ? 
C2 C1 C6 C5 -3.3(5) . . . . ? 
S1 C1 C6 C5 175.9(3) . . . . ? 
C2 C1 C6 N1 175.4(3) . . . . ? 
S1 C1 C6 N1 -5.5(4) . . . . ? 
C4 C5 C6 C1 2.9(5) . . . . ? 
C4 C5 C6 N1 -175.6(3) . . . . ? 
C7 N1 C6 C1 -147.5(3) . . . . ? 
Fe1 N1 C6 C1 28.3(4) . . . . ? 
C7 N1 C6 C5 31.1(5) . . . . ? 
Fe1 N1 C6 C5 -153.1(3) . . . . ? 
C6 N1 C7 C9 175.6(3) . . . . ? 
Fe1 N1 C7 C9 0.6(6) . . . . ? 
C14' S2 C8 C9 90.7(5) . . . . ? 
C14 S2 C8 C9 -170.0(4) . . . . ? 
Fe1 S2 C8 C9 -42.9(3) . . . . ? 
C14' S2 C8 C13 -84.2(5) . . . . ? 
C14 S2 C8 C13 15.2(5) . . . . ? 
Fe1 S2 C8 C13 142.2(3) . . . . ? 
C13 C8 C9 C10 2.3(6) . . . . ? 
S2 C8 C9 C10 -172.5(3) . . . . ? 
C13 C8 C9 C7 -174.4(4) . . . . ? 
S2 C8 C9 C7 10.7(5) . . . . ? 
N1 C7 C9 C10 -158.9(4) . . . . ? 
N1 C7 C9 C8 17.9(6) . . . . ? 
C8 C9 C10 C11 -3.2(7) . . . . ? 
C7 C9 C10 C11 173.9(4) . . . . ? 
C9 C10 C11 C12 2.1(8) . . . . ? 
C10 C11 C12 C13 0.0(9) . . . . ? 
C11 C12 C13 C8 -0.9(8) . . . . ? 
C9 C8 C13 C12 -0.3(6) . . . . ? 
S2 C8 C13 C12 174.5(3) . . . . ? 
Fe1 N2 C18 C19 93(46) . . . . ? 
O4 S3 C20 F2 -174.7(4) . . . . ? 
O5 S3 C20 F2 64.7(4) . . . . ? 
O6 S3 C20 F2 -54.8(5) . . . . ? 
O4 S3 C20 F1 64.6(4) . . . . ? 
O5 S3 C20 F1 -56.0(4) . . . . ? 
O6 S3 C20 F1 -175.5(4) . . . . ? 
O4 S3 C20 F3 -55.4(4) . . . . ? 
O5 S3 C20 F3 -176.0(4) . . . . ? 
O6 S3 C20 F3 64.5(4) . . . . ? 
  
_diffrn_measured_fraction_theta_max    0.977 
_diffrn_reflns_theta_full              28.42 
_diffrn_measured_fraction_theta_full   0.977 
_refine_diff_density_max    0.734 
_refine_diff_density_min   -1.001 
_refine_diff_density_rms    0.085 
